# Supplementary material for: Impact of a decision aid on reducing uncertainty: pilot study of women in their 40s and screening mammography
Source: PubMed Central journal article supplement (PMC4640415; doi:10.1186/s12911-015-0210-2), 2015-11-10
Supplement: 12911_2015_210_MOESM1_ESM.pdf [file 12911_2015_210_MOESM1_ESM.pdf]

Additional file 1; Screen shots depicting the Values Clarification section of the Mammography Screening Decision Aid



Welcome  
Risk Factors  
Mammography

**Values Clarification**  
Summary  
Final Questions



---

[Email the Research Team](#) © 2011 Paula Sciarati

[Log out](#)



**Instructions: Using a Slider Bar**

- Several times in this program, we ask you to use a slider bar like the one below.
- In each case, one end of the slider is labeled with one option (for example, black) and the other end is labeled with another option (for example, white).



- The box on the bar can be moved. Simply place your pointer on it, left click, hold and drag the box side-to-side to the desired location on the bar. Once it is in the right position, release your left click. Go ahead, give it a try.
- In the example here you'd slide the box to indicate your choice between black on the far left end of the bar, white on the far right end, or some shade of grey, in between.



---

[Email the Research Team](#) © 2011 Paula Sciarati

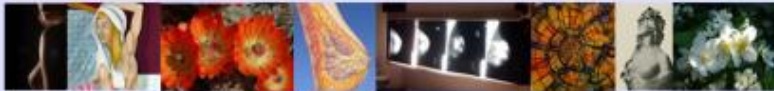

### What Matters to You?

- This program has provided you with a lot of information about breast cancer and breast cancer screening.
- It is now time for you to take that information and decide what it means to you in light of your personal values and circumstances.
- The next few slides present information about possible benefits and risks of screening mammography. Please, consider each statement carefully and then, by moving the sliding box on the bar, indicate which aspect is more important to you.

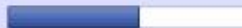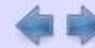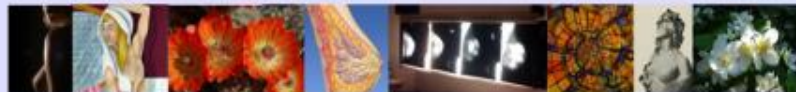

### Time & Access

Which is more important to you, the peace of mind that can come from having a screening mammogram or the logistics of making time to go for the test (i.e., time off from work) and having easy access to a mammography center?

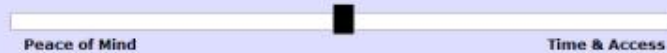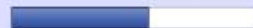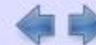

Log out

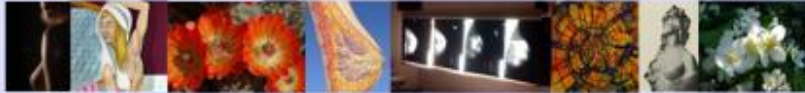

### Embarrassment & Pain

Which is more important to you, the peace of mind that can come from having a screening mammogram or the possible embarrassment and pain of having your breasts compressed?

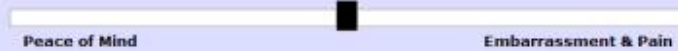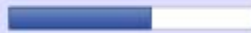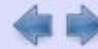

[Email the Research Team](#)

© 2011 Paula Sciarati

Log out

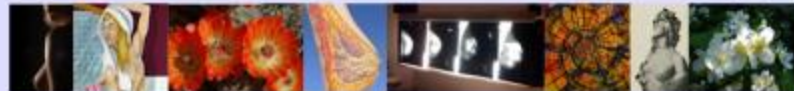

### Positive Tests

Which is more important to you, *having* a positive test when cancer is present or *avoiding* a positive test when cancer is not present.

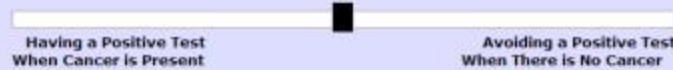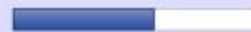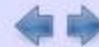

[Email the Research Team](#)

© 2011 Paula Sciarati

Log out

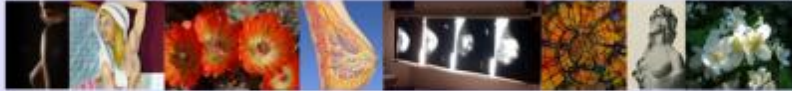

## Negative Tests

Which is more important to you, having a negative screening mammogram test when cancer is not present or avoiding a negative screening mammogram test when cancer is present?

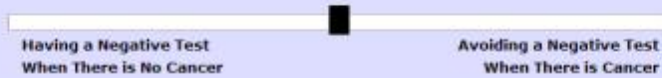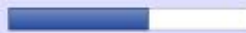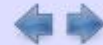

[Email the Research Team](#)

© 2011 Paula Sciarati

Log out

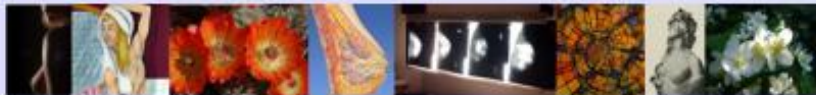

## Radiation Exposure

The amount of radiation that you get from a screening mammogram is about what you would receive over 3 months from your usual surroundings (e.g. sun, rocks, soil, buildings, air and food). But, it is cumulative over time. Which is more important to you, detecting breast cancer early or concerns about radiation exposure?

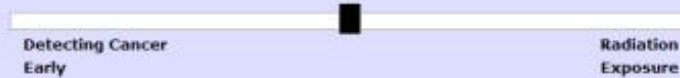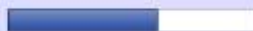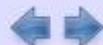

[Email the Research Team](#)

© 2011 Paula Sciarati

Log out

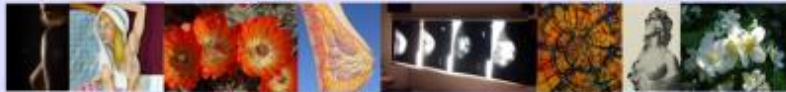

## Overdiagnosis

Screening mammograms may detect cancers that would never go on to create further problems. This is called overdiagnosis. Which is more important to you, detecting a cancer that could be fatal or avoiding the detection of a cancer that would never be fatal?

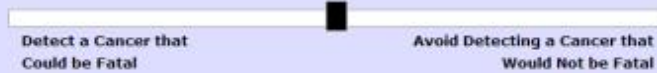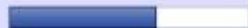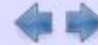

[Email the Research Team](#)

© 2011 Paula Scariati

Log out

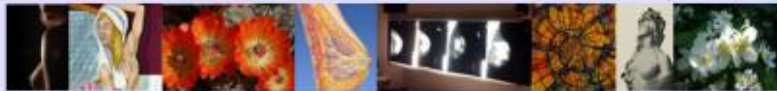

## Stress & Fear

Which is more important to you, the peace of mind that can come from having a screening mammogram or the potential stress & fear that can result if follow-up testing is required?

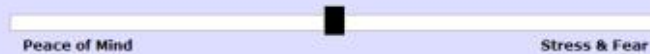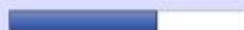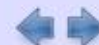

[Email the Research Team](#)

© 2011 Paula Scariati

Log out

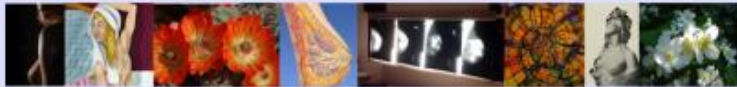

### Cost

How much would you spend for a screening mammogram test?

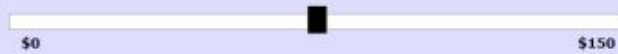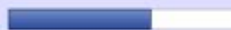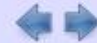

[Email the Research Team](#)

© 2011 Paula Scarlati

Log out

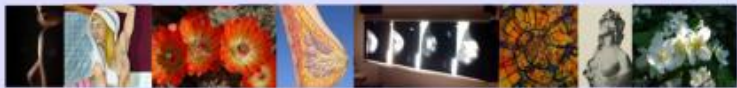

### Cost

Does your health insurance company pay for screening mammograms?

- Yes, it covers 100%
- Yes, but with a copay
- No
- I don't know
- I don't have health insurance

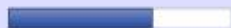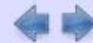

[Email the Research Team](#)

© 2011 Paula Scarlati

Log out

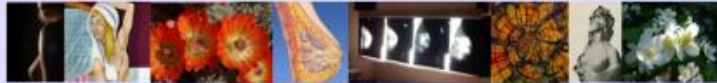

### What Matters Most to Me?

Now please take these 10 areas that you just considered and sort them into most, least and middle importance. Drag the light gray items into the appropriate box.

| Most Important                   | Moderate Importance                    | Least Important                                            |
|----------------------------------|----------------------------------------|------------------------------------------------------------|
| Avoiding False Positives<br>Cost | Peace of Mind<br>Catching Cancer Early | Avoiding False Negatives<br>Overdiagnosis<br>Stress & Fear |

Embarrassment & Pain

Time & Access

Radiation Exposure

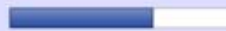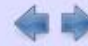

[Email the Research Team](#)

© 2011 Paula Scariati
